# Supplementary material
Source: Research Square preprint supplement (doi:10.21203/rs.3.rs-8975751/v1)
Supplement: Supplementary file 1 [file 47a1c9c5095b51be248d9ded.docx]

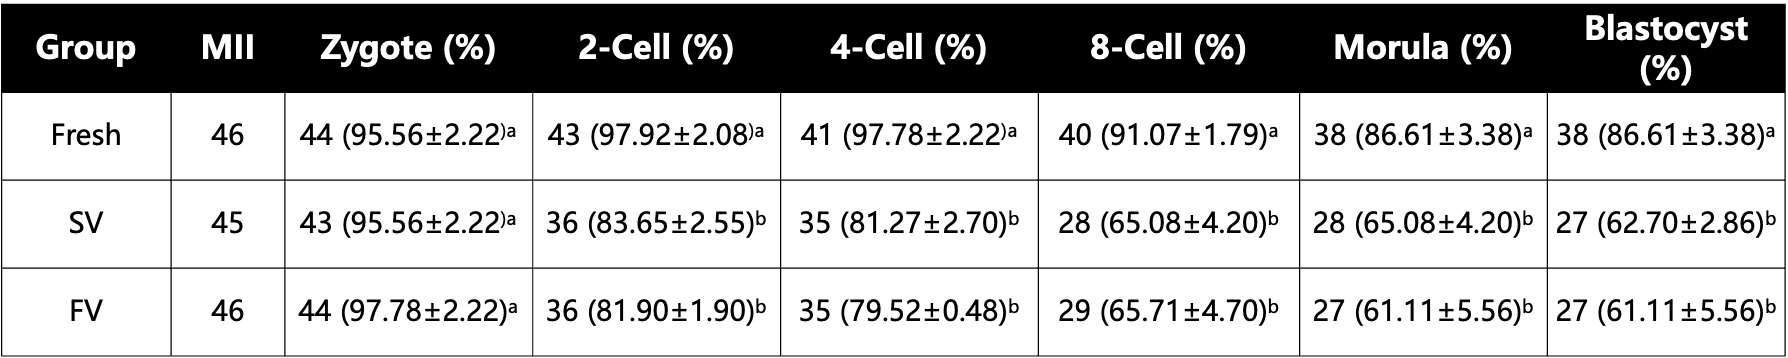
**Table 1. Comparison of fertilization and embryonic development following oocytes vitrified by SV and FV procedures.**

Fertilization rate = (No. of zygotes / No. of MII oocytes) × 100%;

2-Cell rate = (No. of 2-cell embryos / No. of zygotes) × 100%;

4-Cell rate = (No. of 4-cell embryos / No. of zygotes) × 100%;

8-Cell rate = (No. of 8-cell embryos / No. of zygotes) × 100%;

Morula rate = (No. of morulae / No. of zygotes) × 100%;

Blastocyst rate = (No. of blastocysts / No. of zygotes) × 100%.

Data are presented as Mean ± SEM (N = 3).

a,b within a column, values with different superscript letters are significantly different (P < 0.05).
